# Supplementary material
Source: PubMed Central journal article supplement (PMC7572339)
Supplement: 11682_2019_86_MOESM1_ESM.pdf [file 11682_2019_86_MOESM1_ESM.pdf]

White Matter Disconnection is Related to Age-Related Phonological Deficits

Sara B.W.Troutman<sup>1</sup> and Michele T. Diaz<sup>1</sup>

<sup>1</sup>Pennsylvania State University, University Park, PA, USA, 16802

Journal: Brain Imaging and Behavior

Corresponding author:

Michele T. Diaz, PhD

Department of Psychology

Pennsylvania State University

365 Moore Building, University Park, PA, USA, 16802

Tel: +1 814 863 1726

Fax: + 1 814 863 7002

e-mail: [mtd143@psu.edu](mailto:mtd143@psu.edu)

ORCID: 0000-0001-7263-1694

|               | <b>Control Tract</b>                                                                 | <b>Semantic Tracts</b>                                                                                                   |                                                                                  | <b>Phonological Tracts</b>                                                                                                     |                                                                                                       |
|---------------|--------------------------------------------------------------------------------------|--------------------------------------------------------------------------------------------------------------------------|----------------------------------------------------------------------------------|--------------------------------------------------------------------------------------------------------------------------------|-------------------------------------------------------------------------------------------------------|
|               | <b>frontal striatal tract (FS)</b>                                                   | <b>inferior longitudinal fasciculus (ILF)</b>                                                                            | <b>middle longitudinal fasciculus (MDLF)</b>                                     | <b>frontal aslant tract (FAT)</b>                                                                                              | <b>superior longitudinal fasciculus (SLF) III /arcuate fasciculus (AF)</b>                            |
| <b>Seed</b>   | dorsolateral prefrontal cortex as defined as a 8mm sphere centered at X=22 Y=87 Z=38 | temporal pole as defined by the Harvard Oxford Cortical Atlas thresholded at 25%                                         | angular gyrus as defined by the Harvard Oxford Cortical Atlas thresholded at 25% | supplementary motor cortex (SMA) and pre-SMA as defined by the Harvard Oxford Cortical Atlas thresholded at 25%                | inferior frontal gyrus pars operculus, as defined by Harvard Oxford Cortical Atlas thresholded at 25% |
| <b>Target</b> | caudate defined by the Harvard Oxford Atlas thresholded at 25%                       | temporo-occipital portion of the inferior temporal gyrus defined by the Harvard Oxford Cortical Atlas thresholded at 25% | temporal pole defined by the Harvard Oxford Cortical Atlas thresholded at 25%    | inferior frontal gyrus pars operculus and pars triangulares as defined by the Harvard Oxford Cortical Atlas thresholded at 25% | superior temporal gyrus defined by Harvard Oxford Cortical Atlas thresholded at 25%                   |
